# Supplementary material for: Clarifying the role of an unavailable distractor in human multiattribute choice
Source: eLife journal article supplement (doi:10.7554/elife.83316), 2022-12-06

**a****Bayesian Model Comparison**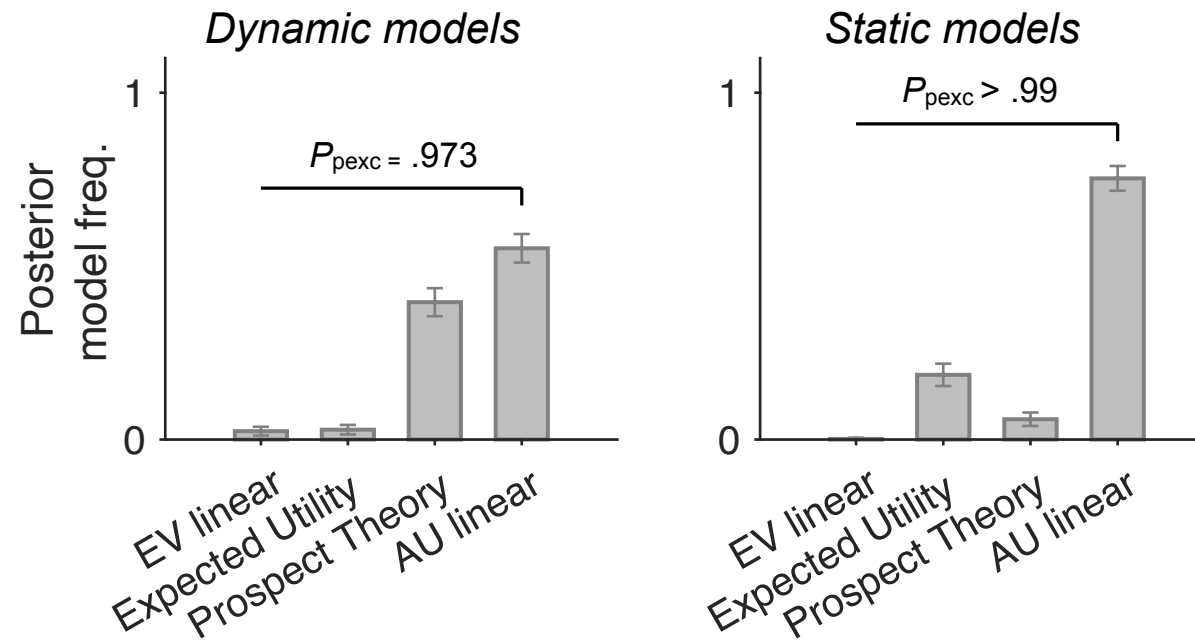**b****Best-fitting prospect-theory utility and probability functions**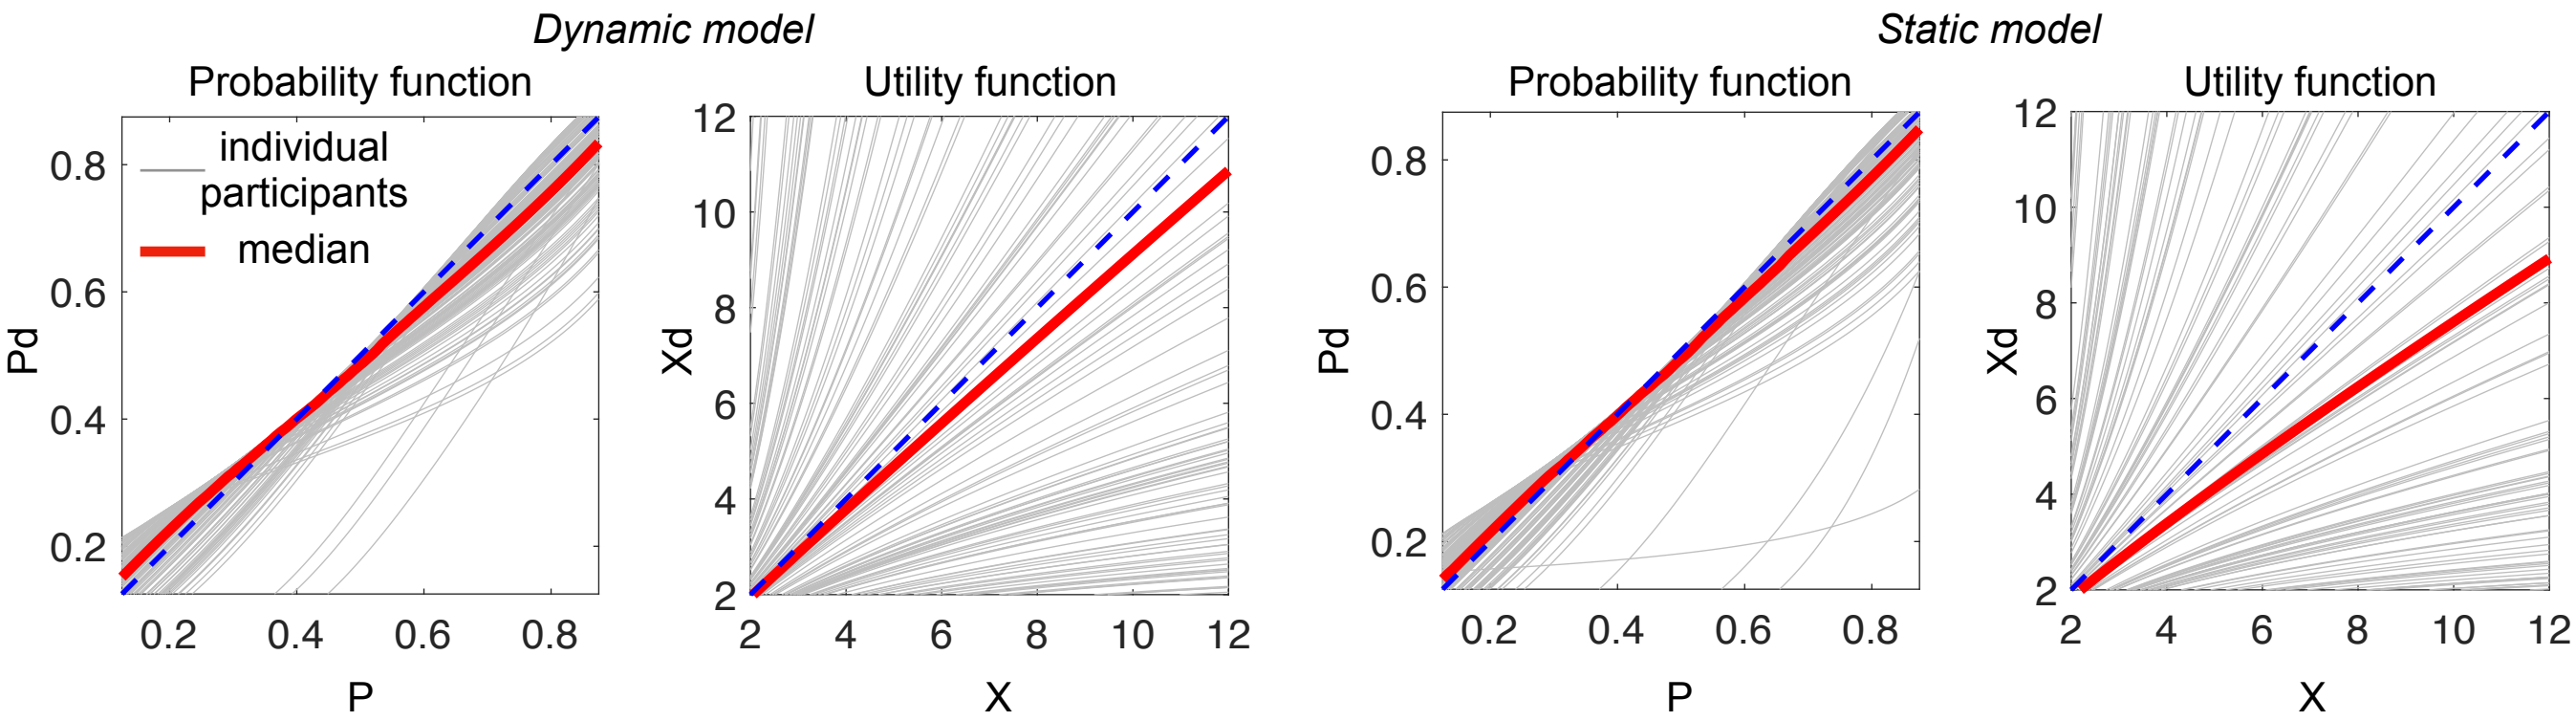

Supplement: supp [file elife-83316-supp-v1.zip]
