# Supplementary material for: Clarifying the role of an unavailable distractor in human multiattribute choice
Source: eLife journal article supplement (doi:10.7554/elife.83316), 2022-12-06

# Logistic regression analysis of relative accuracy (human)

## DV - HV as distractor variable

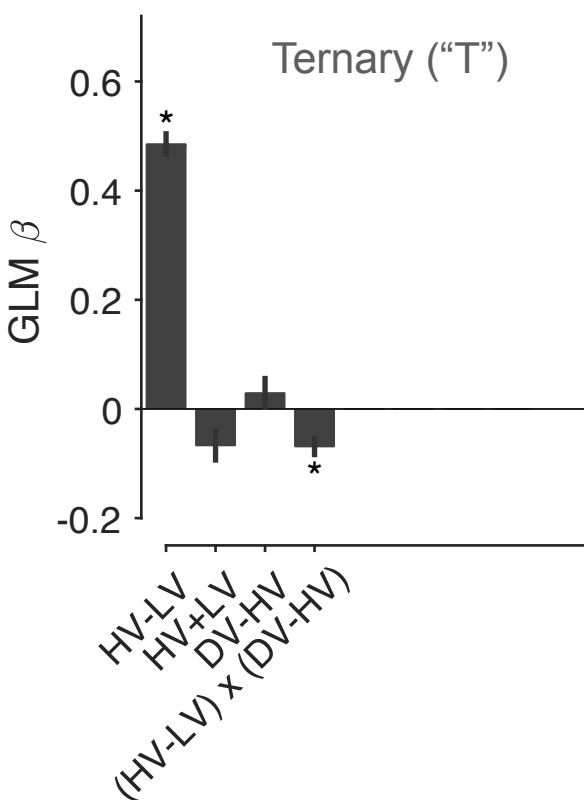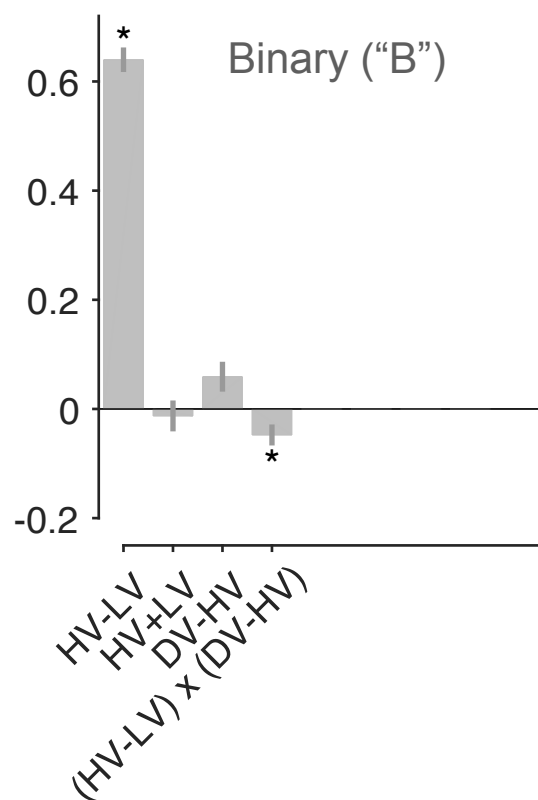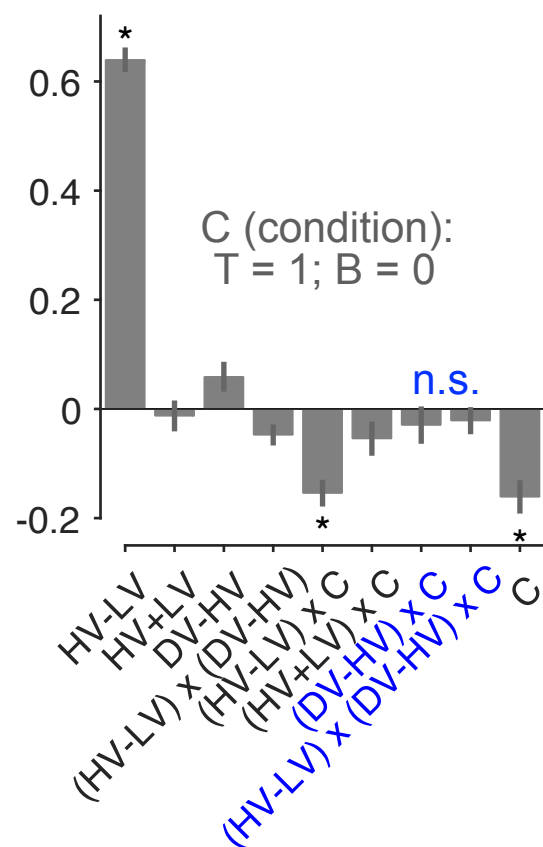

## DV as distractor variable

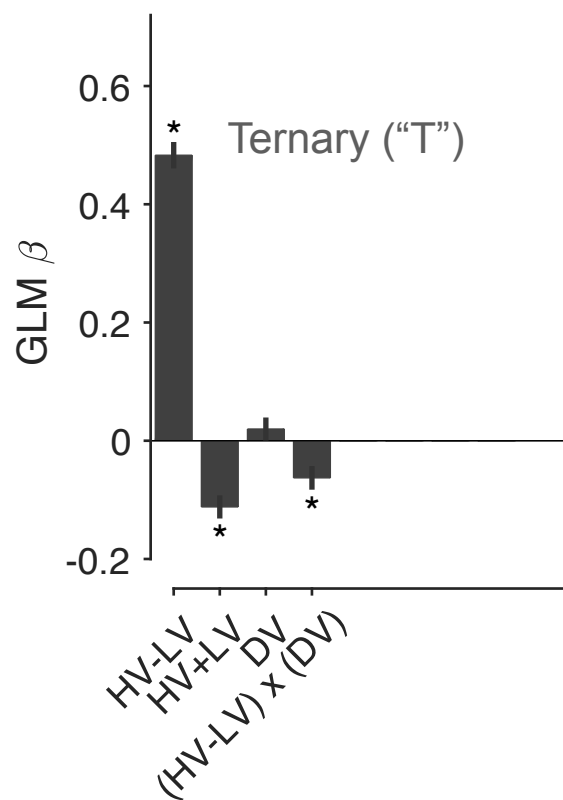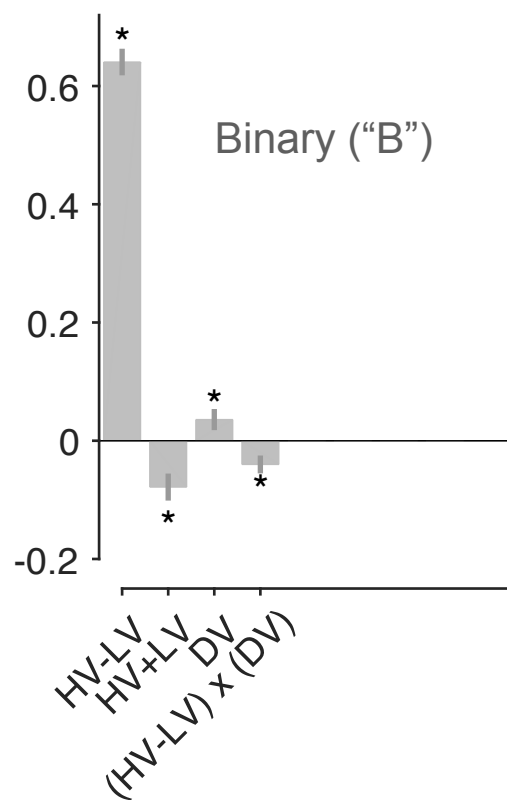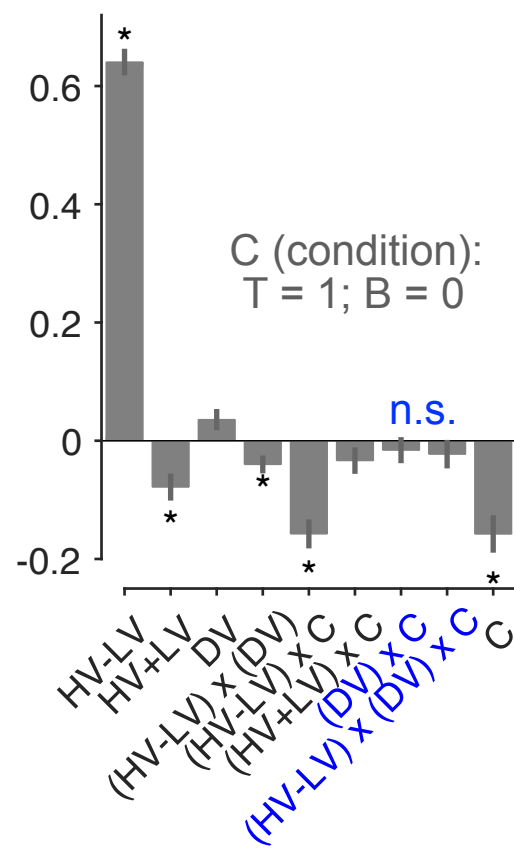

Supplement: supp [file elife-83316-supp-v1.zip]
