# Supplementary figures and images for: Clarifying the role of an unavailable distractor in human multiattribute choice
Source: eLife journal article supplement (doi:10.7554/elife.83316), 2022-12-06

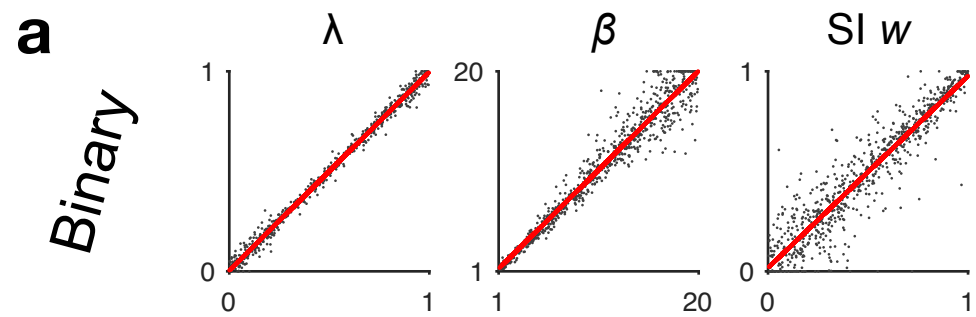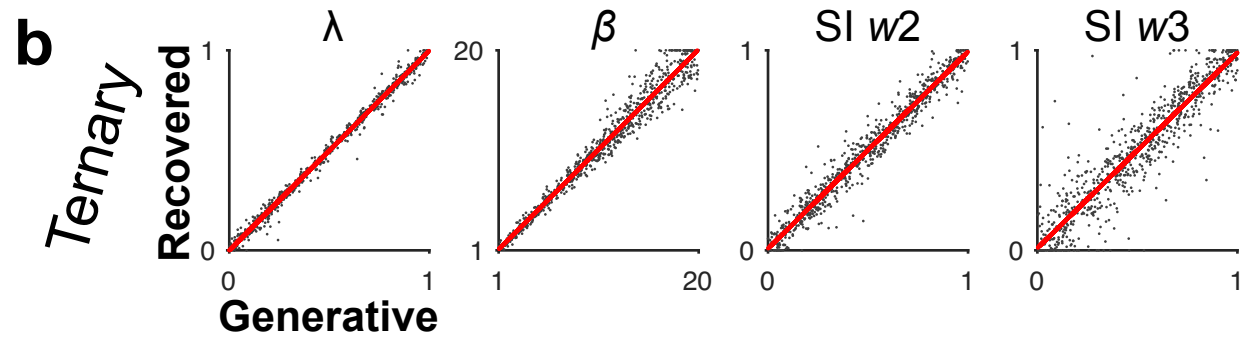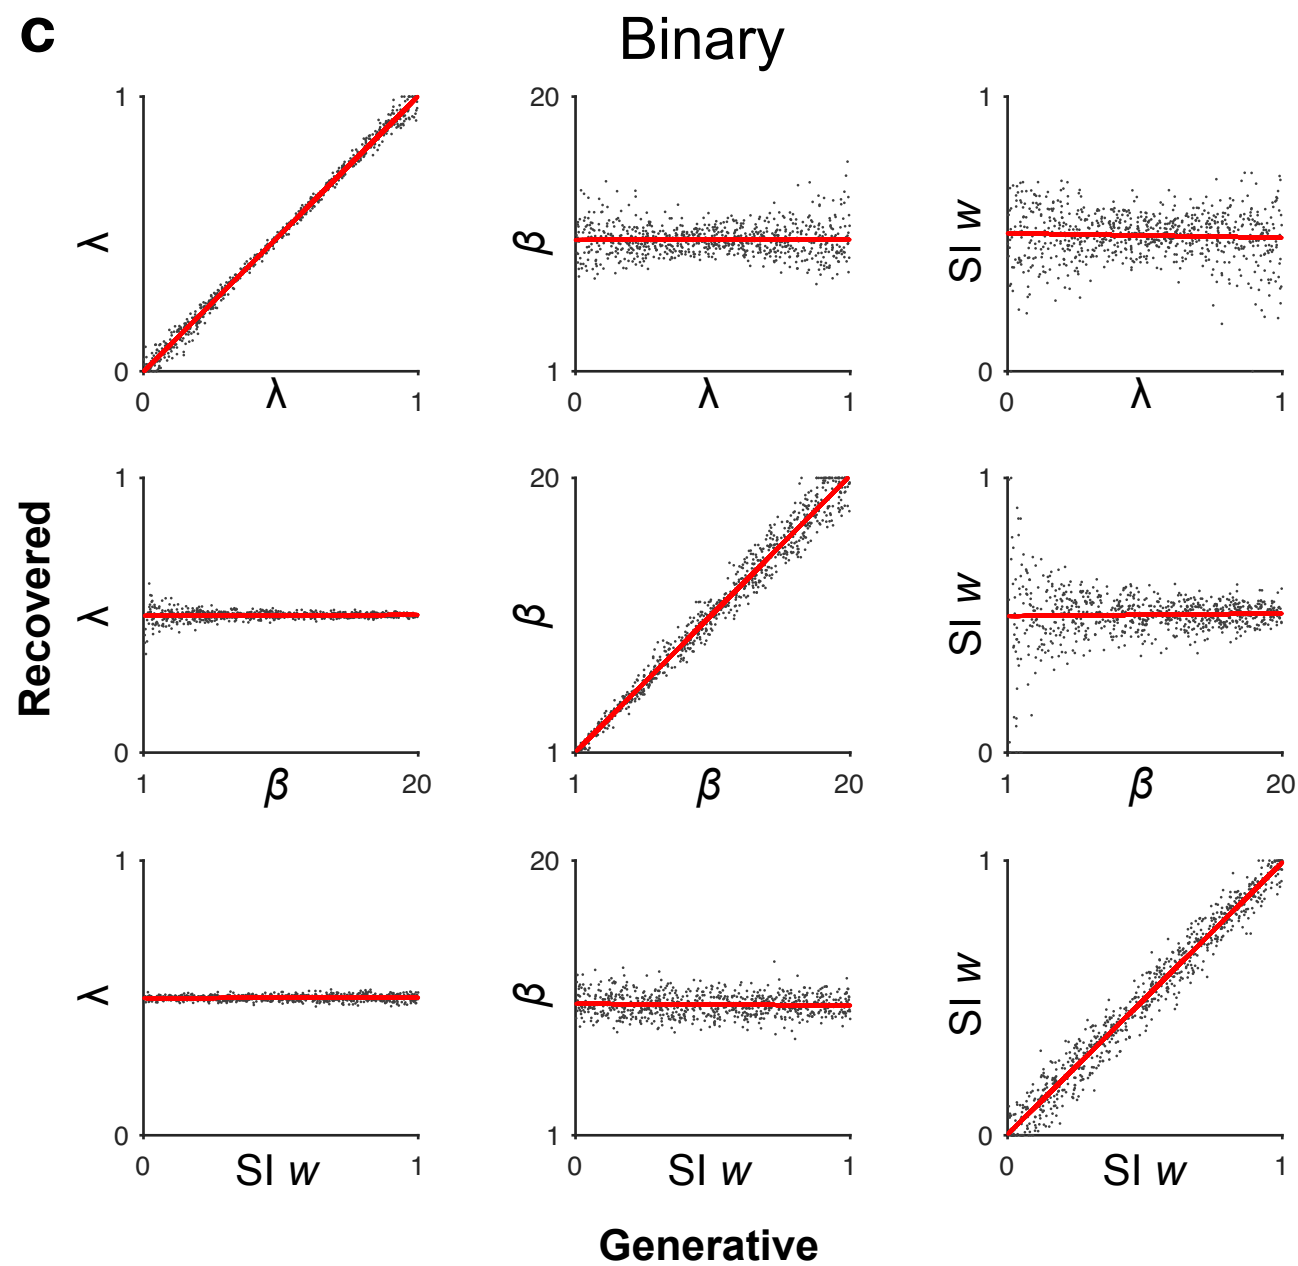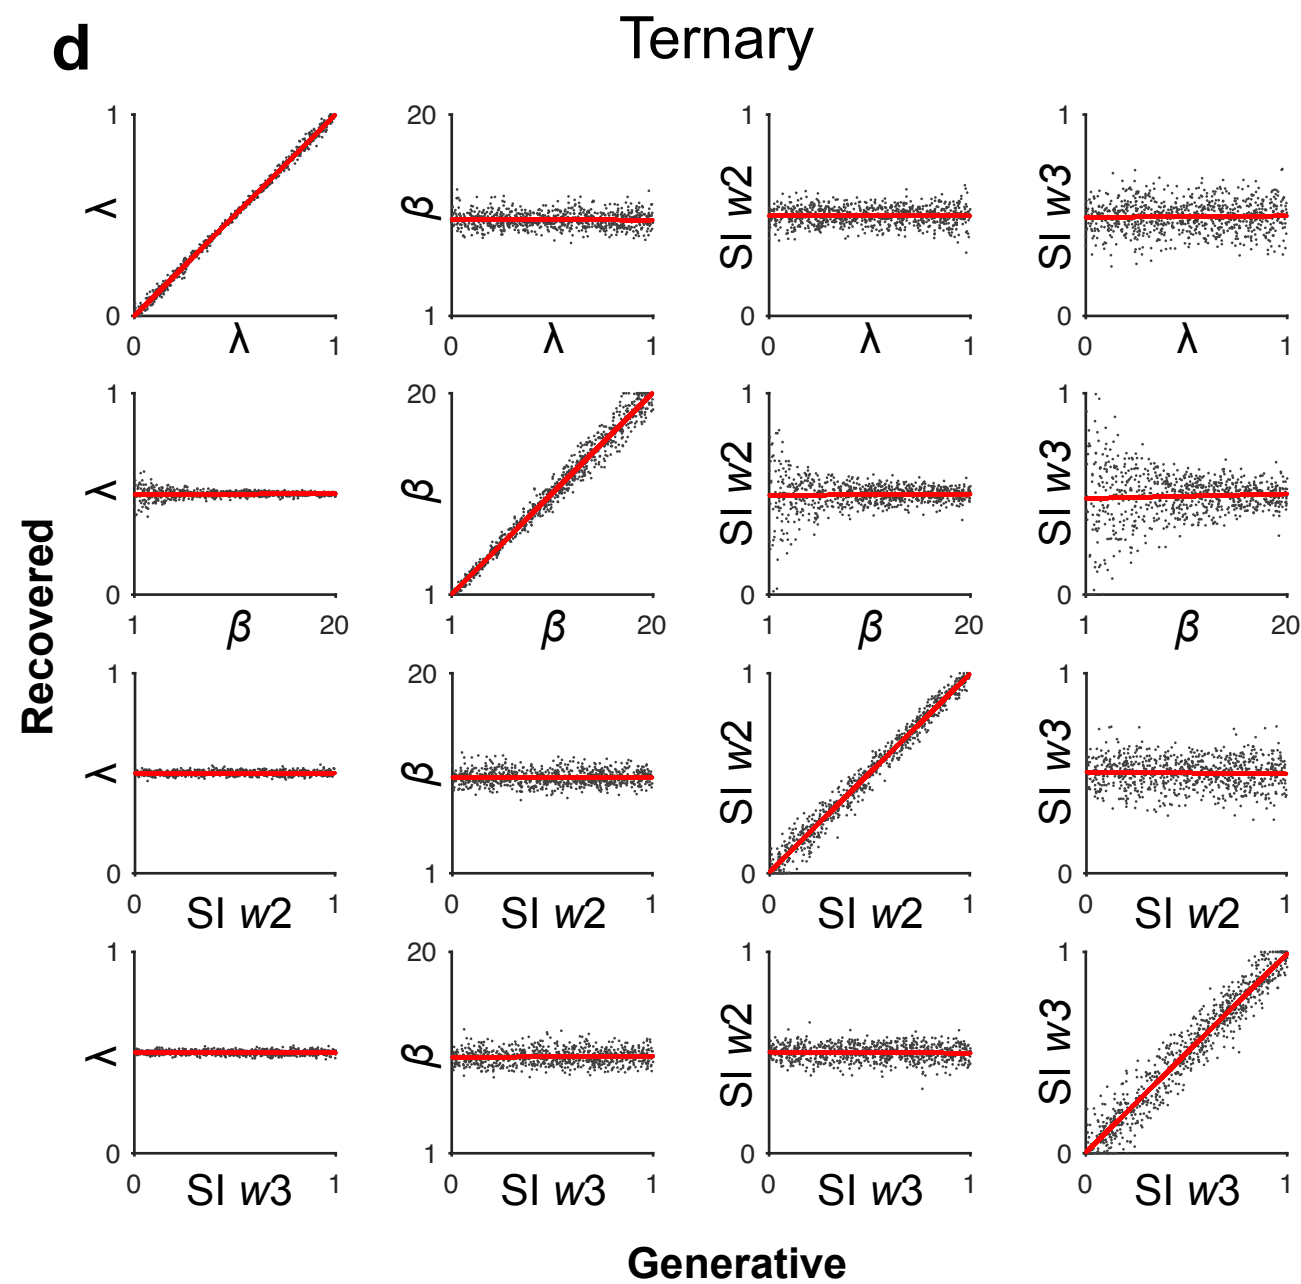

Supplement: supp [file elife-83316-supp-v1.zip]

**a** *Original study (Nat. Neuro., 2014)*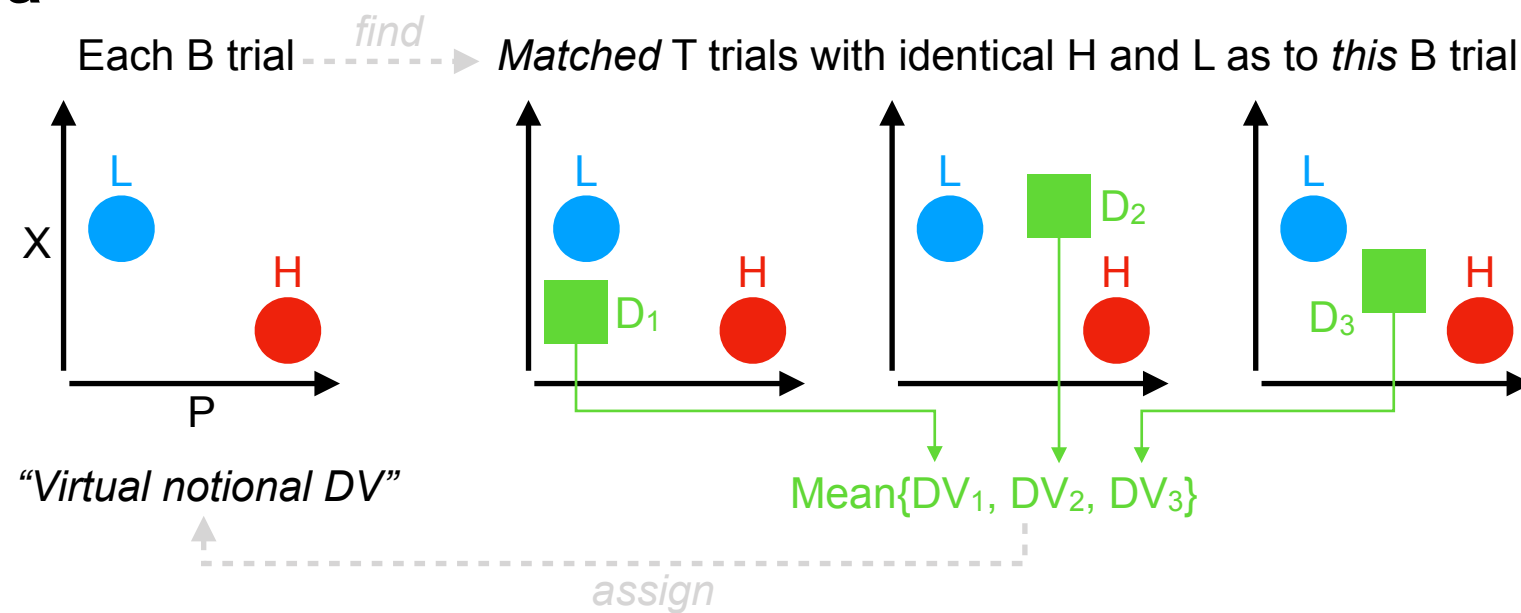**b**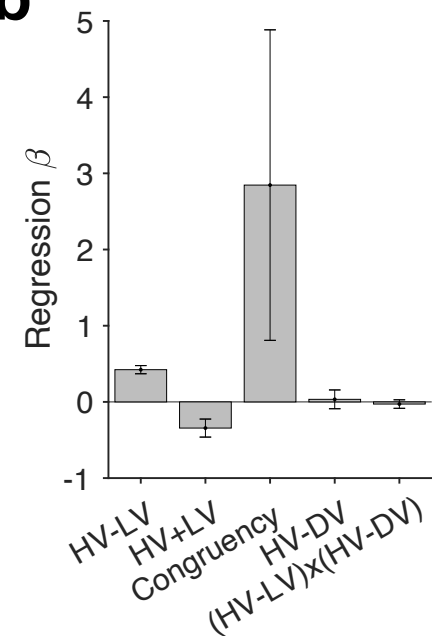**c** *Conventional baselining approach (used in this paper)*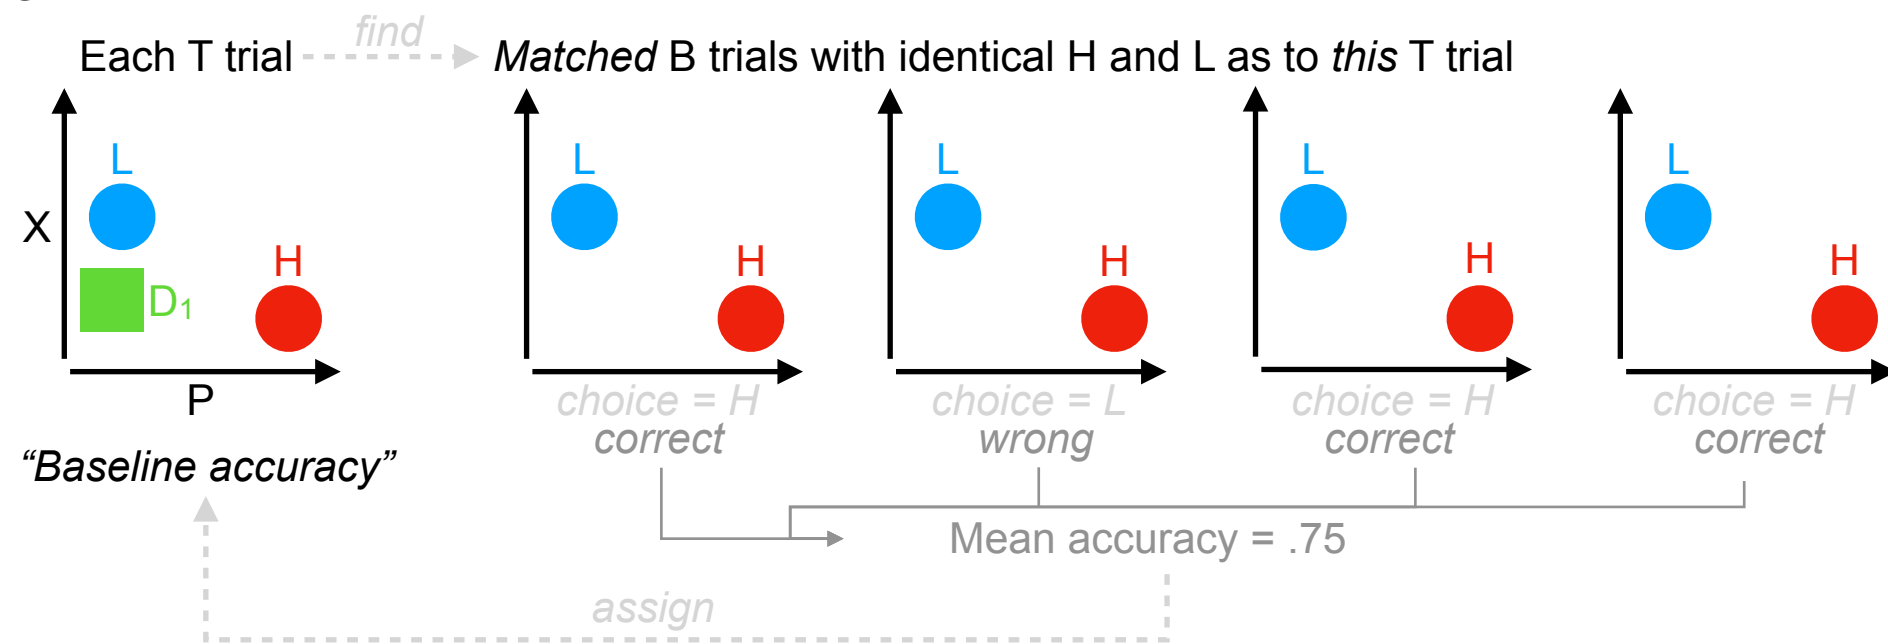

Supplement: supp [file elife-83316-supp-v1.zip]

# Bayesian Model Comparison

**a**

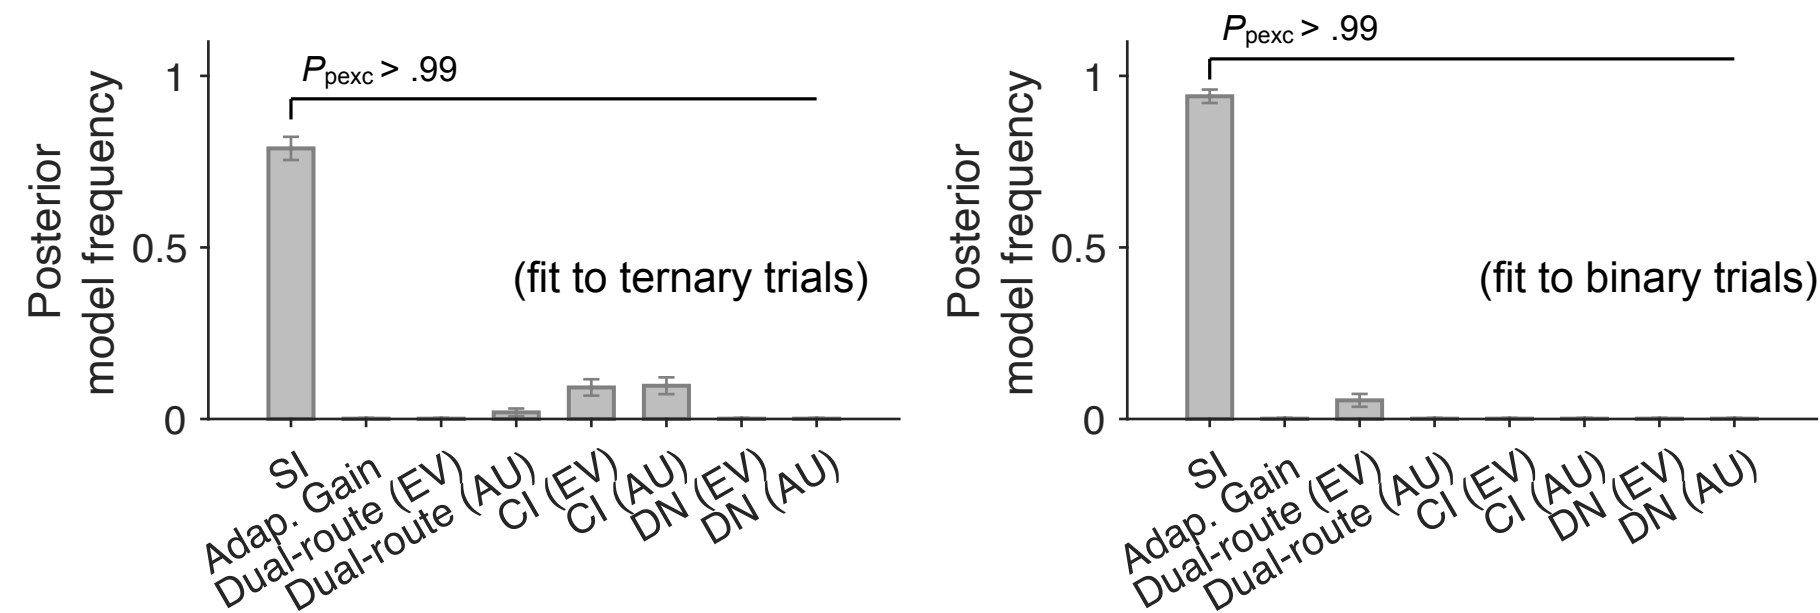

**b**

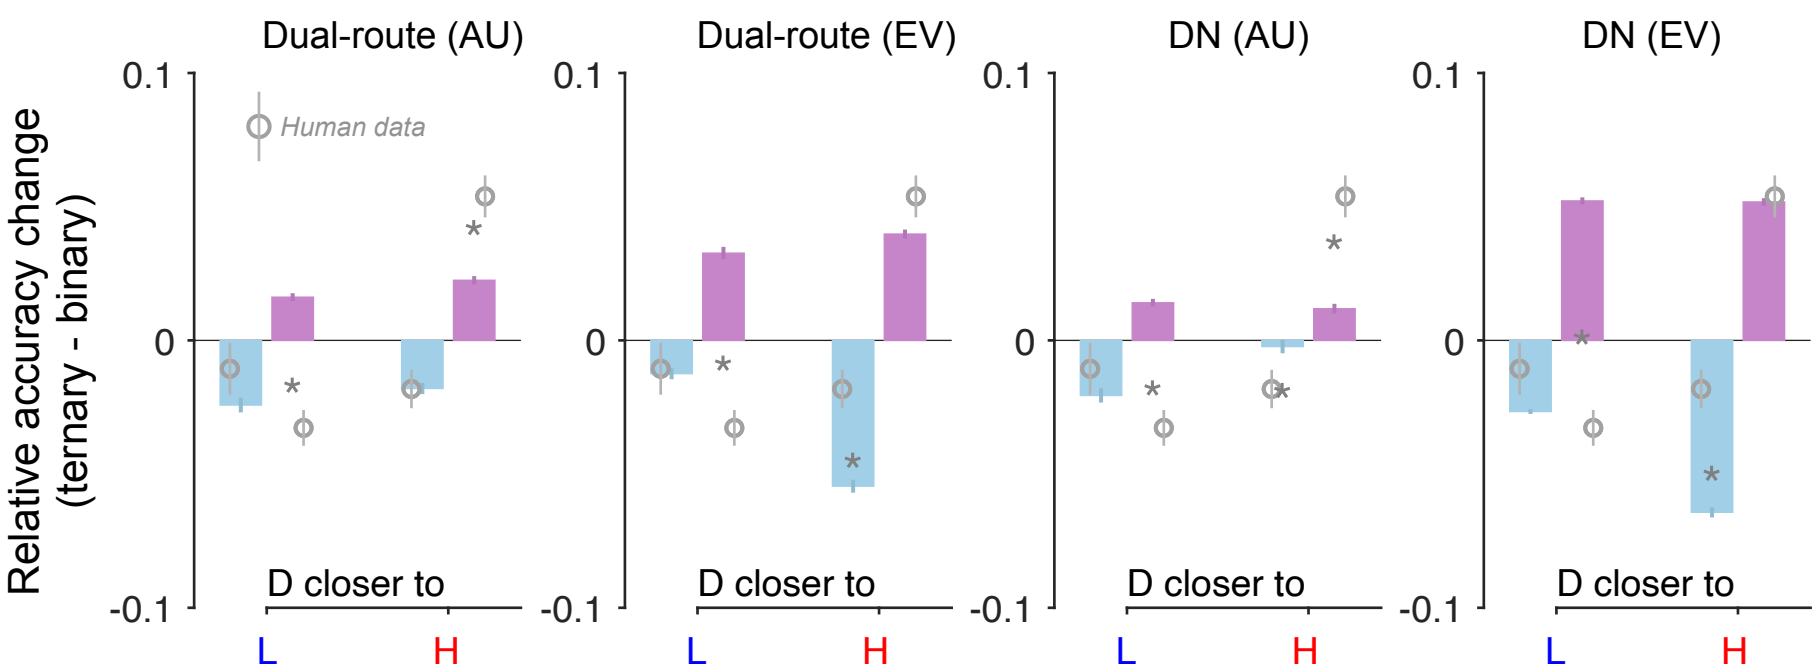

**c**

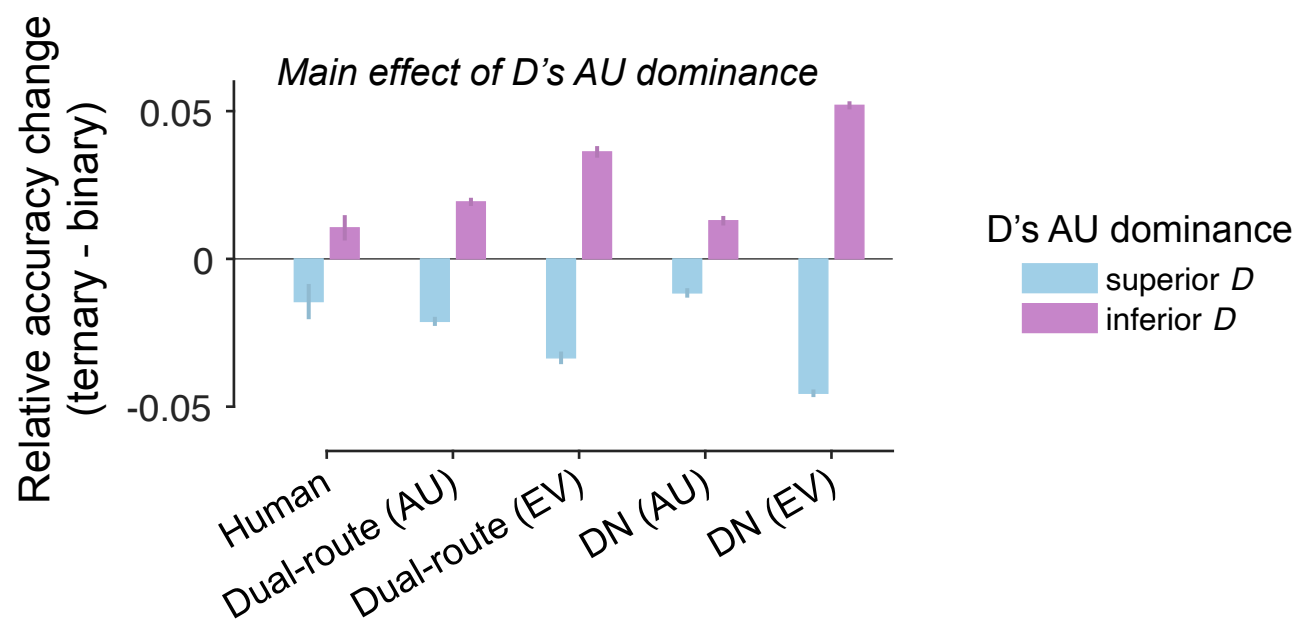

Supplement: supp [file elife-83316-supp-v1.zip]

# Logistic regression analysis of relative accuracy (human)

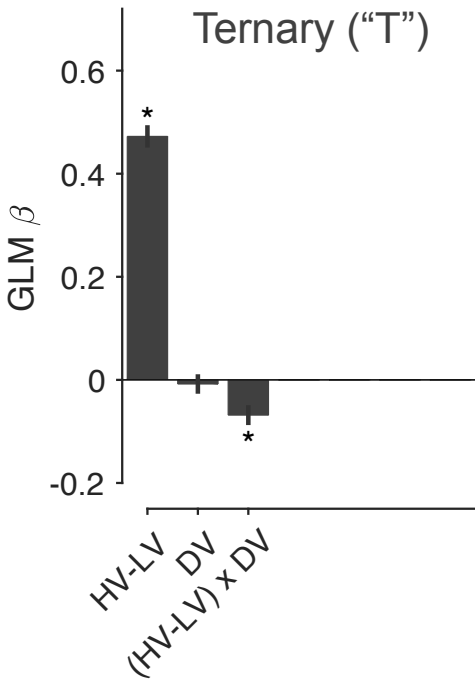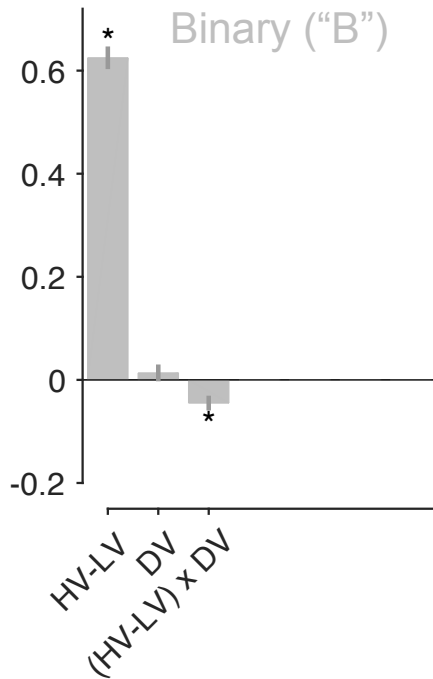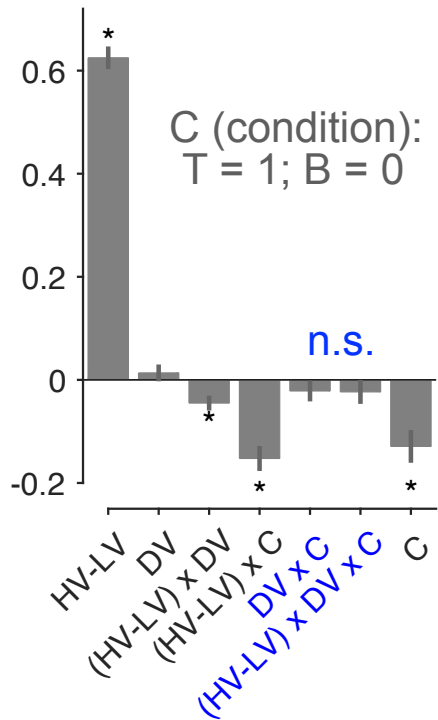

Supplement: supp [file elife-83316-supp-v1.zip]
